# Supplementary material for: Mixed azide and substituted 1,2,4-triazole co-ligand bridged 1D chain cadmium(ii) motif: crystal structure, Hirshfeld surfaces and spectroscopic studies
Source: Royal Society of Chemistry journal article supplement (doi:10.1039/c3ra46125d), 2014-01-01
Supplement: c3ra46125d.pdf [file c3ra46125d.pdf]

# Mixed azide and substituted 1, 2, 4-triazole co-ligand bridged 1D chain Cadmium(II) motif: crystal structure, Hirshfeld surfaces and spectroscopic studies

Yang-Hui Luo,<sup>a</sup> Dong-En Wu,<sup>a</sup> Shu-Wang Ge,<sup>a</sup> Yuan Li,<sup>a</sup> and Bai-Wang Sun<sup>\*a</sup>

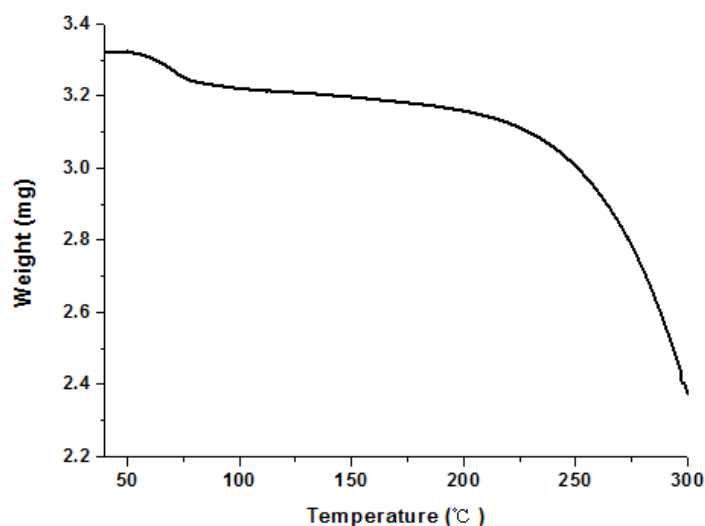

**Fig. S1** TGA profiles of complex **1** in temperature range of 40-300 °C, the mass loss before 90 °C refer to the sublimation of water molecules.

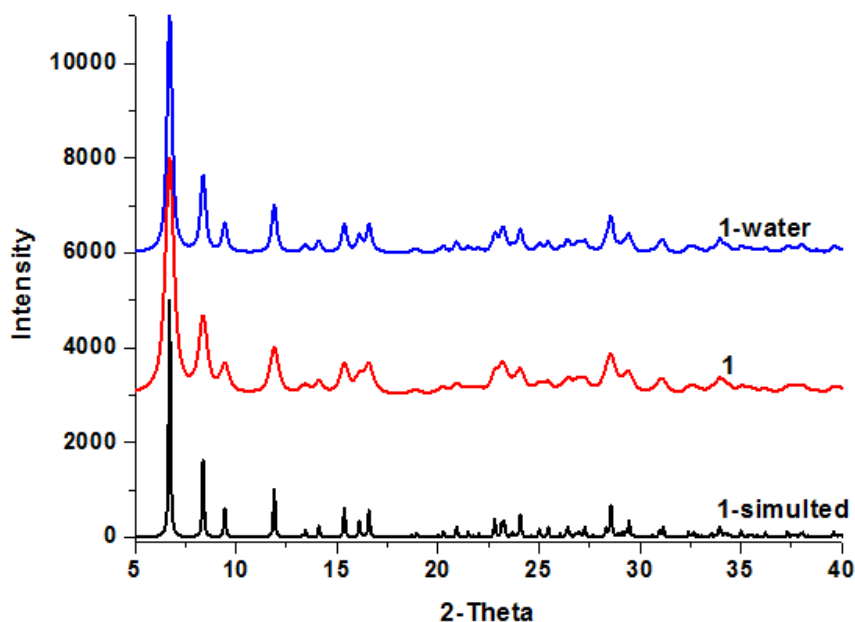

**Fig. S2** Simulated and experienced PXRD profiles of complex **1**, and experienced PXRD profiles of dehydrated form of **1** (**1-water**).
